# Supplementary material for: A Systematic Literature Review of Packed Red Cell Transfusion Usage in Adult Extracorporeal Membrane Oxygenation
Source: PubMed Central journal article supplement (PMC8065680; doi:10.3390/membranes11040251), 2021-03-30
Supplement: membranes-11-00251-s001.pdf [file membranes-11-00251-s001.pdf]

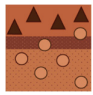

Review

# A Systematic Literature Review of Packed Red Cell Transfusion Usage in Adult Extracorporeal Membrane Oxygenation

Thomas Hughes <sup>1</sup>, David Zhang <sup>2</sup>, Priya Nair <sup>1,2</sup> and Hergen Buscher <sup>1,2,\*</sup>

<sup>1</sup> Department of Intensive Care Medicine, St Vincent’s Hospital, Sydney 2010, Australia; thomas.hughes@health.nsw.gov.au (T.H.); Priya.Nair@svha.org.au (P.N.)

<sup>2</sup> Faculty of Medicine, University of New South Wales, Sydney 2052, Australia; davidzhang549@gmail.com

\* Correspondence: Hergen.buscher@svha.org.au

**Table S1.** Search strategy.

| Medline                                                                                                                               |
|---------------------------------------------------------------------------------------------------------------------------------------|
| 1. exp extracorporeal oxygenation/                                                                                                    |
| 2. exp bleeding/                                                                                                                      |
| 3. exp blood transfusion/ or exp transfusion medicine/ or exp transfusion/ or exp erythrocyte transfusion/ or exp plasma transfusion/ |
| 4. exp fresh frozen plasma/                                                                                                           |
| 5. exp fibrinogen/                                                                                                                    |
| 6. exp heparin/                                                                                                                       |
| 7. exp anticoagulation/                                                                                                               |
| 8. exp thromboembolism/ or exp venous thromboembolism/                                                                                |
| 9. exp lung embolism.                                                                                                                 |
| 10. 2 or 3 or 4 or 5 or 6 or 7 or 8 or 9.                                                                                             |
| 11. 1 and 10.                                                                                                                         |
| 12. limit 11 to (abstracts and human and (adult <18–64 years> or aged <65+ years)).                                                   |
| 13. limit 12 to yr =“1996–2016”                                                                                                       |

  

| Embase                                                                                                                                              |
|-----------------------------------------------------------------------------------------------------------------------------------------------------|
| 1. exp extracorporeal membrane oxygenation/                                                                                                         |
| 2. exp hemorrhage/                                                                                                                                  |
| 3. exp platelet transfusion/ or blood transfusion/ or exp blood component transfusion/ or exp erythrocyte transfusion/ or exp transfusion medicine/ |
| 4. exp plasma/                                                                                                                                      |
| 5. exp fibrinogen/                                                                                                                                  |
| 6. exp heparin/                                                                                                                                     |
| 7. exp anticoagulants/ or exp thromboembolism/                                                                                                      |
| 8. exp pulmonary embolism/                                                                                                                          |
| 9. 2 or 3 or 4 or 5 or 6 or 7 or 8.                                                                                                                 |
| 10. 1 and 9.                                                                                                                                        |
| 11. limit 10 to (abstracts and English language and humans and “all adult (19 plus years)”)                                                         |

Table S2. Newcastle-Ottawa Scores.

| Author/Year     | Type   | Selection: Representativeness of Exposed Cohort | Selection: Representativeness of Non-Exposed Cohort | Selection: Ascertainment of Exposure | Selection: Demonstration that Outcome Present at Study Start | Comparability of Cohorts Based on Design and Analysis | Outcome Assessment | Out-Come-Timing of Follow Up | Out-Come-Adequacy of Follow Up | Total NOS (max = 9) |
|-----------------|--------|-------------------------------------------------|-----------------------------------------------------|--------------------------------------|--------------------------------------------------------------|-------------------------------------------------------|--------------------|------------------------------|--------------------------------|---------------------|
| Anselmi 2016    | Cohort |                                                 | ✓                                                   |                                      | ✓                                                            | ✓✓                                                    | ✓                  | ✓                            | ✓                              | 7                   |
| Buscher 2016    | Cohort | ✓                                               | ✓                                                   | ✓                                    | ✓                                                            | ✓                                                     | ✓                  | ✓                            | ✓                              | 8                   |
| Czobor 2016     | Cohort | ✓                                               | ✓                                                   | ✓                                    | ✓                                                            | ✓                                                     | ✓                  | ✓                            | ✓                              | 8                   |
| Hryniewicz 2016 | Cohort | ✓                                               |                                                     | ✓                                    | ✓                                                            |                                                       | ✓                  | ✓                            | ✓                              | 6                   |
| Krueger 2016    | Cohort | ✓                                               |                                                     | ✓                                    | ✓                                                            |                                                       | ✓                  | ✓                            | ✓                              | 6                   |
| Mazzeffi 2016   | Cohort | ✓                                               | ✓                                                   | ✓                                    | ✓                                                            | ✓                                                     | ✓                  | ✓                            | ✓                              | 8                   |
| Opfermann 2016  | Cohort | ✓                                               | ✓                                                   | ✓                                    | ✓                                                            | ✓                                                     | ✓                  | ✓                            | ✓                              | 8                   |
| Pan 2016        | Cohort | ✓                                               | ✓                                                   | ✓                                    | ✓                                                            |                                                       | ✓                  | ✓                            | ✓                              | 7                   |
| Staudacher 2016 | Cohort | ✓                                               | ✓                                                   | ✓                                    | ✓                                                            | ✓                                                     | ✓                  | ✓                            | ✓                              | 8                   |
| Tanaka 2016     | Cohort | ✓                                               | ✓                                                   | ✓                                    | ✓                                                            | ✓                                                     | ✓                  | ✓                            | ✓                              | 8                   |
| Tauber 2016     | Cohort | ✓                                               | ✓                                                   | ✓                                    | ✓                                                            | ✓                                                     | ✓                  | ✓                            | ✓                              | 8                   |
| Trudzinski 2016 | Cohort | ✓                                               | ✓                                                   | ✓                                    |                                                              |                                                       | ✓                  | ✓                            |                                | 5                   |
| Agerstrand 2015 | Cohort | ✓                                               | ✓                                                   | ✓                                    | ✓                                                            | ✓                                                     | ✓                  | ✓                            | ✓                              | 8                   |
| Esper 2015      | Cohort | ✓                                               |                                                     | ✓                                    | ✓                                                            |                                                       | ✓                  | ✓                            | ✓                              | 6                   |
| Halaweish 2015  | Cohort | ✓                                               | ✓                                                   | ✓                                    | ✓                                                            |                                                       | ✓                  | ✓                            | ✓                              | 7                   |
| Ius 2015        | Cohort | ✓                                               |                                                     | ✓                                    | ✓                                                            |                                                       | ✓                  | ✓                            | ✓                              | 6                   |
| Lehle 2015      | Cohort | ✓                                               | ✓                                                   | ✓                                    | ✓                                                            | ✓✓                                                    | ✓                  | ✓                            | ✓                              | 9                   |
| Li 2015         | Cohort | ✓                                               | ✓                                                   | ✓                                    |                                                              | ✓                                                     | ✓                  | ✓                            | ✓                              | 7                   |
| Mohite 2015     | Cohort | ✓                                               | ✓                                                   | ✓                                    | ✓                                                            |                                                       | ✓                  | ✓                            | ✓                              | 7                   |
| Omar 2015       | Cohort | ✓                                               | ✓                                                   | ✓                                    | ✓                                                            | ✓                                                     | ✓                  | ✓                            | ✓                              | 8                   |
| Panigada 2015   | Cohort | ✓                                               |                                                     | ✓                                    | ✓                                                            |                                                       | ✓                  | ✓                            | ✓                              | 6                   |
| Poss 2015       | Cohort |                                                 |                                                     | ✓                                    | ✓                                                            |                                                       | ✓                  | ✓                            | ✓                              | 5                   |
| San Roman 2015  | Cohort | ✓                                               |                                                     | ✓                                    | ✓                                                            |                                                       | ✓                  | ✓                            | ✓                              | 6                   |
| Voelker 2015    | Cohort | ✓                                               | ✓                                                   | ✓                                    | ✓                                                            |                                                       | ✓                  | ✓                            | ✓                              | 7                   |
| Wu 2015         | Cohort | ✓                                               |                                                     | ✓                                    | ✓                                                            |                                                       | ✓                  | ✓                            | ✓                              | 6                   |
| Guirand 2014    | Cohort | ✓                                               | ✓                                                   | ✓                                    | ✓                                                            |                                                       | ✓                  | ✓                            | ✓                              | 7                   |
| Loforte 2014    | Cohort | ✓                                               | ✓                                                   | ✓                                    | ✓                                                            |                                                       | ✓                  | ✓                            | ✓                              | 7                   |
| Roch 2014       | Cohort | ✓                                               | ✓                                                   | ✓                                    | ✓                                                            |                                                       | ✓                  | ✓                            | ✓                              | 7                   |
| Shum 2014       | Cohort | ✓                                               | ✓                                                   | ✓                                    | ✓                                                            |                                                       | ✓                  | ✓                            | ✓                              | 7                   |
| Fagnoul 2013    | Cohort | ✓                                               | ✓                                                   | ✓                                    | ✓                                                            |                                                       | ✓                  | ✓                            | ✓                              | 7                   |
| Michaels 2013   | Cohort | ✓                                               | ✓                                                   | ✓                                    | ✓                                                            |                                                       | ✓                  | ✓                            | ✓                              | 7                   |
| Mikus 2013      | Cohort | ✓                                               | ✓                                                   | ✓                                    | ✓                                                            |                                                       | ✓                  | ✓                            | ✓                              | 7                   |
| Pieri 2013      | Cohort | ✓                                               | ✓                                                   | ✓                                    | ✓                                                            |                                                       | ✓                  | ✓                            | ✓                              | 7                   |
| Repesse 2013    | Cohort |                                                 | ✓                                                   | ✓                                    | ✓                                                            |                                                       | ✓                  | ✓                            | ✓                              | 6                   |
| Loforte 2012    | Cohort |                                                 | ✓                                                   | ✓                                    | ✓                                                            |                                                       | ✓                  | ✓                            | ✓                              | 6                   |
| Park 2012       | Cohort | ✓                                               | ✓                                                   | ✓                                    | ✓                                                            |                                                       | ✓                  | ✓                            | ✓                              | 7                   |
| Garcia 2011     | Cohort |                                                 | ✓                                                   | ✓                                    | ✓                                                            |                                                       | ✓                  | ✓                            | ✓                              | 6                   |
| Han 2011        | Cohort | ✓                                               | ✓                                                   | ✓                                    | ✓                                                            |                                                       | ✓                  | ✓                            | ✓                              | 7                   |
| Lamarche 2011   | Cohort |                                                 |                                                     | ✓                                    | ✓                                                            |                                                       | ✓                  | ✓                            | ✓                              | 5                   |
| Formica 2010    | Cohort | ✓                                               | ✓                                                   | ✓                                    | ✓                                                            |                                                       | ✓                  | ✓                            | ✓                              | 7                   |
| Kanji 2010      | Cohort | ✓                                               | ✓                                                   | ✓                                    | ✓                                                            |                                                       | ✓                  | ✓                            | ✓                              | 7                   |
| Marasco 2010    | Cohort | ✓                                               | ✓                                                   | ✓                                    | ✓                                                            |                                                       | ✓                  | ✓                            | ✓                              | 7                   |
| Rastan 2010     | Cohort | ✓                                               | ✓                                                   | ✓                                    | ✓                                                            |                                                       | ✓                  | ✓                            | ✓                              | 7                   |
| Ang 2009        | Cohort | ✓                                               | ✓                                                   | ✓                                    | ✓                                                            |                                                       | ✓                  | ✓                            | ✓                              | 7                   |
| Davies 2009     | Cohort | ✓                                               | ✓                                                   | ✓                                    | ✓                                                            |                                                       | ✓                  | ✓                            |                                | 6                   |
| Muller 2009     | Cohort | ✓                                               | ✓                                                   | ✓                                    | ✓                                                            |                                                       | ✓                  | ✓                            | ✓                              | 7                   |
| Bakhtiary 2008  | Cohort | ✓                                               | ✓                                                   | ✓                                    | ✓                                                            |                                                       | ✓                  | ✓                            | ✓                              | 7                   |
| Dietl 2008      | Cohort | ✓                                               | ✓                                                   | ✓                                    | ✓                                                            |                                                       | ✓                  | ✓                            | ✓                              | 7                   |
